# Supplementary material for: 3,4-Phenylenedioxythiophene (PheDOT): a novel platform for the synthesis of planar substituted π–donor conjugated systems
Source: Royal Society of Chemistry journal article supplement (doi:10.1039/b400491d), 2004-01-01
Supplement: b400491d.doc [file b400491d.doc]

**ELECTRONIC SUPPLEMENTARY INFORMATION**

***EXPERIMENTAL PROCEDURES AND CHARACTERIZATIONS***

Electrochemical studies were performed in a standard three-electrode configuration under the argon blanket. The working electrode was a 1 mm Pt disk sealed in glass, the reference electrode was Ag/AgCl 0.1 M, the potential scans were performed with an EG&G 273 potentiostat. The supporting electrolyte was tetrabutylammonium hexafluorophosphate (Fluka puriss, used as received). 1H NMR and 13C NMR spectra were recorded on a Bruker AVANCE DRX 500 spectrometer operating at 500.13 and 125.7 MHz;  are given in ppm (relative to TMS) and coupling constants (J) in Hz. Mass spectra were recorded under EI or FAB mode on a VG-Autospec mass spectrometer, under MALDI-TOF mode on a MALDI-TOF-MS BIFLEX III Bruker Daltonics spectrometer or under positive electrospray (ESI+) on a JMS-700 JEOL mass spectrometer of reversed geometry. UV-visible optical data were recorded with a Perkin-Elmer lambda 19 spectrophotometer. IR spectra were recorded on a Perkin-Elmer model 841 spectrophotometer, samples being embedded in KBr discs or thin films between NaCl plates. Melting points were obtained from a Reichert-Jung Thermovar hot-stage microscope apparatus and are uncorrected. Column chromatography purifications were carried out on Merck silica gel Si 60 (40-63 m).

**SYNTHESIS OF CATECHOL DERIVATIVES**

**1-(3,4-dimethoxyphenyl)-hexan-1-one 6**

25,4mL (181mmol, d=0.959) of hexanoyl chloride, 23.1mL (1eq, d=1.08) of veratrole and 700mL of dichloromethane are introduced in a 2L three neck flask. The mixture is cooled using ice bath and a solution of 26.5g (1.1eq) of aluminium trichloride dissolved in 200mL de dichloromethane is carefully dropped. The resulting mixture is then refluxed under nitrogen atmosphere during 26 hour. After hydrolysis with 500mL of HCl 6M, the aqueous phase is extracted twice with 400mL of dichloromethane. The organic phases are recombined and washed with 400 of a saturated solution of K2CO3 and dried on magnesium sulphate. After evaporation of solvent, the residue is distilled in Kugelrohr (T=125-160°C, P=4-1mbar). The yellow oil is isolated in 62% yield (26.3g).

Rf=0.29 (CH2Cl2).

NMR 1H (CDCl3) : 7.63 (dd, 1H, 3J=8.36Hz, 4J=2Hz)- 7.53 (d, 1H, 4J=1.97Hz)- 6.88 (d, 1H, 3J=8.36Hz)- 3.94 (d, 6H)*-* 2.91 (t, 2H, 3J=7.5Hz)- 1.73 (m, 2H)- 1.35 (m, 4H)- 0.9 (m, 3H).

HRMS (EI, M+) for C14H20O3: calcd. 236.1412; found 236.1415.

**4-hexyl-1,2-dimethoxy-benzene 7**

8g (33.9mmol, 1eq) of 1-(3,4-dimethoxyphenyl)-hexan-1-one in 270mL of toluene are dropped in one three neck flask containing 8.95g (2eq) of AlCl3, 360mL of anhydrous diethyl-ether and 10.3g (8eq.) of LiAlH4. After 1h30 of agitation at room temperature, LiAlH4 is destroyed by addition of 32mL of ethyl acetate and 84mL of HCl 6M. The mixture is stirred overnight under nitrogen atmosphere after what the organic phase is washed twice with 600mL of water. The obtained aqueous phase is extracted twice with 600mL of diethyl-ether and the organic phases are dried and reduced. After chromatography on silica gel using a dichloromethane : petroleum ether 1 :1 mixture as eluent the yellow oil is isolated in 97% yield (7.3g).

Rf=0,37 (EP : CH2Cl2 1 : 1).

NMR 1H (CDCl3) : 6.8 (d, 1H, 3J=8.74Hz)- 6.73 (dd, 1H, 4J=1.88Hz)- 6.72 (s, 1H)- 3.89 (s, 3H)- 3.87 (s, 3H)- 2.57 (t, 2H, 3J=7.7Hz)- 1.64 (m, 2H)- 1.33 (m, 6H)- 0.91 (t, 3H, 3J=6.76Hz).

HRMS (EI, M+) for C14H22O2: calcd. 222.1620; found 222.1617.

**1-(2-hexyl-4,5-dimethoxy-phenyl)-hexan-1-one**

8g (36mmol) of 4-hexyl-1,2-dimethoxy-benzene, 5mL (1eq, d=0.959) of hexanoyl chloride and 140mL of dichloromethane are introduced in a 2L three neck flask. The mixture is cooled using ice bath and a solution of 5.2g (1.1eq, 39.6mmol) of aluminium trichloride dissolved in 60mL of dichloromethane is carefully dropped. The resulting mixture is then refluxed under nitrogen atmosphere during 22 hour. After hydrolysis with 100mL of HCl 6M, the aqueous phase is extracted twice with 150mL of dichloromethane. The organic phases are recombined and washed with 200mL of a saturated solution of K2CO3 and dried on magnesium sulphate. After evaporation of solvent, the residue is purified by chromatography using dichloromethane as eluent. 8.2g of oil (yield 71%) are isolated.

Rf=0.41 (CH2Cl2).

NMR 1H (CDCl3) : 7.11 (s, 1H)- 6.71 (s, 1H)- 3.92 (s, 3H)- 3.90 (s, 3H)- 2.82 (m, 4H)- 1.71 (m, 2H)- 1.56 (m, 2H)- 1.35(m, 10H)- 0.9 (m, 6H).

IR: 1679 cm-1 (Ph-CO-R).

HRMS (EI, M+) for C20H32O3: calcd. 320.2351; found 320.2345.

**1,2-dihexyl-4,5-dimethoxy-benzene 8**

7.9g (24.7mmol, 1eq) of 1-(2-hexyl-4,5-dimethoxy-phenyl)-hexan-1-one in 200mL of toluene are dropped in a 1L three neck flask containing 6.6g (2eq.) of AlCl3, 268mL of anhydrous diethyl-ether and 7.6g (8eq.) of LiAlH4. After 1h of stirring at room temperature, LiAlH4 is destroyed by addition of 25mL ethyl acetate and 60mL of HCl 6M. The mixture is stirred overnight under nitrogen atmosphere after what the organic phase is washed twice with 450mL of water. The obtained aqueous phase is extracted twice with 500mL of diethyl-ether and the organic phases are dried and reduced. After chromatography on silica gel using a dichloromethane : petroleum ether 1 : 1 mixture as eluent the yellow oil is isolated in 86% yield (6.8g).

Rf=0.6 (EP : CH2Cl2 1 : 1).

NMR 1H (CDCl3) : 6.65 (s, 2H)- 3.85 (s, 6H)- 2.53 (t, 4H, 3J=7.87Hz)- 1.56 (m, 4H)- 1.33 (m, 12H)- 0.9 (t, 6H, 3J=6.5Hz).

HRMS (EI, M+) for C20H34O2: calcd. 306.2559; found 306.2537.

**4-hexyl-benzene-1,2-diol 9**

4g (108mmol) of 4-hexyl-1,2-dimethoxy-benzene, 18.13g of hydrobromic acid (48%, 6eq.) and 18.13g of acetic anhydride (10eq.) are introduced in a 100mL three neck flask. The mixture is heated at 100°C under nitrogen atmosphere during 21h, cooled at room temperature and 150mL of water are added. The organic layer is extracted twice with ether and the combined organic phases are washed with a saturated NaHCO3 solution. After drying on magnesium sulphate and evaporation of solvent, the residue is chromatographied on silica gel using dichloromethane as eluent affording 1.42g (yield 41%) of oil.

Rf=0,06 (CH2Cl2).

NMR 1H (CDCl3) : 6.77 (d, 1H,3J=7.83Hz)- 6.7 (d, 1H,4J=1.89Hz)- 6.61 (dd, 1H, 3J=7.83Hz,4J=1.89Hz)- 5.3 (s, 2H)- 2.49 (t, 2H, 3J=7.69Hz)- 1.55 (m, 2H)- 1.28 (m, 6H)- 0.88 (t, 3H, 3J=6.61Hz).

**4,5-dihexyl-benzene-1,2-diol 10**

4g (13.1mmol) of 1,2-dihexyl-4,5-dimethoxy-benzene dissolved in 140mL of dry CH2Cl2 (distilled on CaH2) under nitrogen atmosphere are cooled to -20°C. 4,94mL of BBr3 (4 eq., d=2.65) are dropped in the solution which is then allowed to warn to room temperature. The mixture is stirred 2h30 after what 400g of ice is added. After 45min, the solution is saturated with NaCl and extracted 4 times with 200mL of dichloromethane. The organic layers are collected, washed twice with 300mL of saturated NaCl solution and dried on magnesium sulphate. After evaporation, the catechol derivative is purified by chromatography on silica gel (eluent: CH2Cl2) affording 3.4g (yield 93%) of colourless oil.

Rf=0,12 (CH2Cl2).

NMR 1H (CDCl3) : 6.66 (s, 2H)- 4.97 (s, 2H)- 2.47 (t, 4H, 3J=7.79Hz)- 1.52 (m, 4H, 3J=7.39Hz)- 1.31 (m, 12H)- 0.9 (t, 6H, 3J=6.4Hz).

HRMS (EI, M+) for C18H30O2: calcd. 278.2246; found 278.2242.

**SYNTHESIS OF PHEDOT DERIVATIVES**

**Method 1**

In a round flask equipped with a Dean Starck apparatus, 3eq. of catechol, 1eq. of dimethoxythiophene and 0.3eq. of paratoluenesulfonic acid are dissolved in benzene. The mixture is refluxed for 64 h, cooled at room temperature and dichloromethane is added. The organic layer is washed twice with an aqueous solution of sodium hydrogenocarbonate, once with water and dried on magnesium sulphate.

**3,4-phenylenedioxythiophene 1**

15g of catechol, 6.54g of dimethoxythiophene, 0.91g of paratoluenesulfonic acid in 100mL of benzene. After evaporation of solvent, the residue is chromatographed on silica gel using cyclohexane as eluent affording 1.77g ( 21%) of a white solid.

Rf=0.7 (EP : CH2Cl2 2 : 1).

M.P. 72°C.

NMR 1H (CDCl3): 6.92 (m, 4H)- 6.43 (s, 2H).

NMR 13C (CDCl3): 140.8 - 139 - 123.7 - 116.8 - 100.9.

HRMS (EI, M+) for C10H6O2S: calcd. 190.0089; found 190.0081.

Anal (Calcd) C (63.14) 62.87, H (3.18) 3.08, S (16.86) 17.27, O (16.82) 16.96.

**3,4-(3-hexyl-phenylenedioxy)-thiophene 2**

1.06g of 4-hexylcatechol, 1.69g of dimethoxythiophene (2eq.), 0.04g of para toluenesulfonic acid in 40mL of benzene. After evaporation of solvent, the residue is chromatographied on silica gel using cyclohexane as eluent affording 0.07g (5%) of a colourless oil.

Rf=0.7 (cyclohexane).

NMR 1H (CDCl3): 6.82 (d, 1H, 3J=8.8Hz)- 6.73 (d, 2H, H3, 3J=7.11Hz)- 6.41 (s, 2H)- 2.52 (t, 2H, 3J=7.7Hz)- 1.58 (m, 2H)- 1.30 (m, 6H)- 0.89 (t, 3H, 3J=6.82Hz).

HRMS (EI, M+) for C16H18O2S: calcd. 274.1028; found 274.1032.

**3,4-(3,4-dihexyl-phenylenedioxy)-thiophene 3**

3g of 4,5-dihexylcatechol, 1.55g of dimethoxythiophene, 0.07g of paratoluenesulfonic acid in 8mL of benzene. After evaporation of solvent, the residue is chromatographed on silica gel using petroleum ether as eluent affording 0.77g ( 20%) of a colorless oil.

Rf=0.39 (EP).

NMR 1H (CDCl3): 6.69 (s, 2H)- 6.40 (s, 2H)- 2.49 (t, 4H, 3J=7.9Hz)- 1.53 (quint, 4H, 3J=7.84Hz)- 1.32 (m, 12H)- 0.89 (t, 6H, 3J=6.86Hz).

NMR 13C (CDCl3): 139.4 - 138.3 - 136.1 - 116.8 -116.7 - 100.5 - 31.9 - 31.7 - 31 - 29.2 - 22.6 - 14.1.

HRMS (EI, M+) for C22H30O2S: calcd. 358.1967; found 358.1964.

Anal (Calcd) C (73.70) 73.69, H (8.43) 8.45.

**Method 2**

1eq. of 3,4-dihydroxy-2,5-dicarboethoxythiophene and 1.1eq. of 1-chloro-2-nitrobenzene are dissolved in dry DMF. 3eq. of potassium carbonate are added and the mixture is heated at 100°C for 6h. Methylene chloride is then added and the organic phase is washed twice with water and dried on silica gel. Rapid filtration on silica gel (methylene chloride as eluent) gives a mixture of mono- and di-carboethoxy 3,4-phenylenedioxythiophene. This mixture, not purified is dissolved in HMPT and heated with LiBr, xH2O at 200°C during two hours. 150mL of methylene chloride are then poured in the flask. The organic layer is washed 10 times with 50mL of water and dried on magnesium sulphate.

**3,4-phenylenedioxythiophene 1**

Filtration conditions and spectroscopic date identical to already indicated. Yield: 6%.

**3,4-(3,4-dicyano-phenylenedioxy)-thiophene 4**

Starting from 0.5g of 3.4-dihydroxy-2,5-dicarboethoxythiophene (1.92mmol) and 0.45g of 2,3-dichloro-4.5-dicyanobenzene in 30mL of dry DMF. Then heated in 10mL of HMPT with 100mg og LiBr, xH2O. After chromatography (methylene chloride as eluent) the pure derivative is isolated in 10% yield.

M.P. >360°C

Rf(CH2Cl2): 0.6

NMR1H (CDCl3): 7.29 (s, 2H)- 6.61 (s, 2H).

NMR13C (CDCl3): 144.6; 136.5; 122.1; 114.6; 111.3; 103.8.

IR (KBr): 2236 (CN).
